# Supplementary material for: Scientific note: Imidacloprid found in wild plants downstream permanent greenhouses in Sweden
Source: Springer Nature journal article supplement (doi:10.1007/s13592-021-00876-4), 2021-08-05
Supplement: MOESM1 [file 13592_2021_876_MOESM1_ESM.pdf]

**Online Resource 1 | Detected concentrations of imidacloprid (ng/g) in all the collected pollen samples. The limit of detection (LOD) was estimated to 0.2 ng/g.**

| <b>Matrix</b> | <b>Site</b> | <b>Imidacloprid (ng/g)</b> | <b>Species</b>               | <b>Sample weight (g)</b> |
|---------------|-------------|----------------------------|------------------------------|--------------------------|
| Anthers       | A           | 4.5                        | <i>Barbarea vulgaris</i>     | 0.005                    |
| Anthers       | A           | < LOD                      | <i>Rosa dumalis</i>          | 0.10                     |
| Anthers       | B           | 0.2                        | <i>Solanum dulcamara</i>     | 0.10                     |
| Anthers       | C           | < LOD                      | <i>Valeriana sp.</i>         | 0.10                     |
| Anthers       | D           | 0.7                        | <i>Ranunculus sceleratus</i> | 0.05                     |
| Anthers       | E           | < LOD                      | <i>Ranunculus acris</i>      | 0.10                     |
| Anthers       | E           | < LOD                      | <i>Valeriana sp.</i>         | 0.02                     |
| Anthers       | F           | 2.0                        | <i>Geum urbanum</i>          | 0.01                     |
| <b>Median</b> |             | <b>0.1</b>                 |                              |                          |
| <b>Mean</b>   |             | <b>0.9</b>                 |                              |                          |
| <b>Std.</b>   |             | <b>1.6</b>                 |                              |                          |

**Online Resource 2 | Detected concentrations of imidacloprid (ng/g) in all the collected leaf samples. The limit of detection (LOD) was estimated to 0.2 ng/g.**

| <b>Matrix</b> | <b>Site</b> | <b>Imidacloprid (ng/g)</b> | <b>Species</b>                   | <b>Sample weight (g)</b> |
|---------------|-------------|----------------------------|----------------------------------|--------------------------|
| Leaves        | A           | < LOD                      | <i>Barbarea vulgaris</i>         | 1.00                     |
| Leaves        | A           | < LOD                      | <i>Epilobium hirsutum</i>        | 1.00                     |
| Leaves        | B           | < LOD                      | <i>Salix sp.</i>                 | 1.00                     |
| Leaves        | B           | < LOD                      | <i>Solanum dulcamara</i>         | 1.00                     |
| Leaves        | C           | < LOD                      | <i>Epilobium hirsutum</i>        | 1.00                     |
| Leaves        | C           | < LOD                      | <i>Valeriana sp.</i>             | 1.00                     |
| Leaves        | D           | 9.3                        | <i>Epilobium hirsutum</i>        | 1.00                     |
| Leaves        | D           | 0.6                        | <i>Filipendula ulmaria</i>       | 1.00                     |
| Leaves        | D           | 0.7                        | <i>Ranunculus acris</i>          | 1.00                     |
| Leaves        | E           | 0.4                        | <i>Ranunculus acris</i>          | 1.00                     |
| Leaves        | E           | 0.6                        | <i>Valeriana sp.</i>             | 1.00                     |
| Leaves        | F           | 0.3                        | <i>Acer pseudoplatanus</i>       | 1.00                     |
| Leaves        | F           | < LOD                      | <i>Acer pseudoplatanus</i>       | 1.00                     |
| Leaves        | F           | 0.4                        | <i>Aegopodium<br/>podagraria</i> | 1.00                     |
| Leaves        | F           | 1.4                        | <i>Ranunculus ficaria</i>        | 1.00                     |
| <b>Median</b> |             | <b>0.3</b>                 |                                  |                          |
| <b>Mean</b>   |             | <b>0.9</b>                 |                                  |                          |
| <b>Std.</b>   |             | <b>2.4</b>                 |                                  |                          |
